# Supplementary material for: β-(1,3)-Glucan derived from Candida albicans induces inflammatory cytokines from macrophages and lamina propria mononuclear cells derived from patients with Crohn's disease
Source: PubMed Central journal article supplement — Intest Res. 2018 Jul 27;16(3):384–92. doi: 10.5217/ir.2018.16.3.384 (PMC6077311; doi:10.5217/ir.2018.16.3.384), 2018-07-27
Supplement: ir-16-384-s001.pdf [file ir-16-384-s001.pdf]

See “ $\beta$ -(1,3)-Glucan derived from *Candida albicans* induces inflammatory cytokines from macrophages and lamina propria mononuclear cells derived from patients with Crohn’s disease” on page 384.

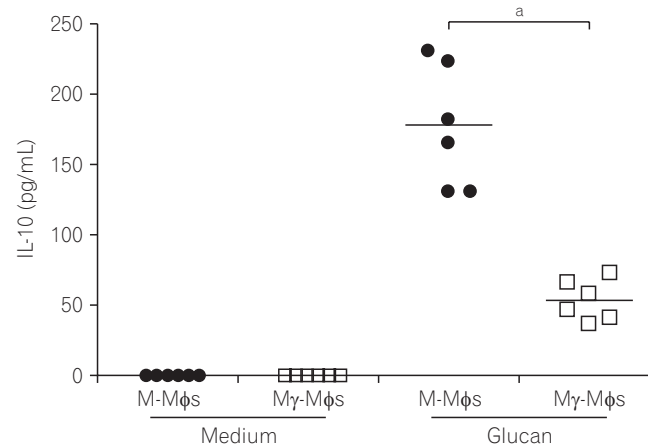

**Supplementary Fig. 1.** M-Mφs produce a large amount of interleukin-10 (IL-10) in response to  $\beta$ -(1,3)-glucan. IL-10 production by macrophages derived from peripheral blood cells from healthy controls ( $n=6$ ) in response to  $\beta$ -(1,3)-glucan (100  $\mu\text{g/mL}$ ) was analyzed using a cytometric bead array kit. CD14<sup>+</sup> monocytes were differentiated in the presence of M-CSF (M-macrophages, M-Mφs) or M-CSF and IFN- $\gamma$  (M-gamma macrophages, Mγ-Mφs). M-Mφs and Mγ-Mφs ( $1 \times 10^6$  cells/mL) were stimulated with  $\beta$ -(1,3)-glucan for 24 hours. Statistical analysis was performed using the Mann-Whitney  $U$ -test. <sup>a</sup> $P < 0.01$ . M-CSF, macrophage colony-stimulating factor; IFN, interferon.
