# Supplementary material for: β-(1,3)-Glucan derived from Candida albicans induces inflammatory cytokines from macrophages and lamina propria mononuclear cells derived from patients with Crohn's disease
Source: PubMed Central journal article supplement — Intest Res. 2018 Jul 27;16(3):384–92. doi: 10.5217/ir.2018.16.3.384 (PMC6077311; doi:10.5217/ir.2018.16.3.384), 2018-07-27
Supplement: ir-16-384-s002.pdf [file ir-16-384-s002.pdf]

See “ $\beta$ -(1,3)-Glucan derived from *Candida albicans* induces inflammatory cytokines from macrophages and lamina propria mononuclear cells derived from patients with Crohn’s disease” on page 384.

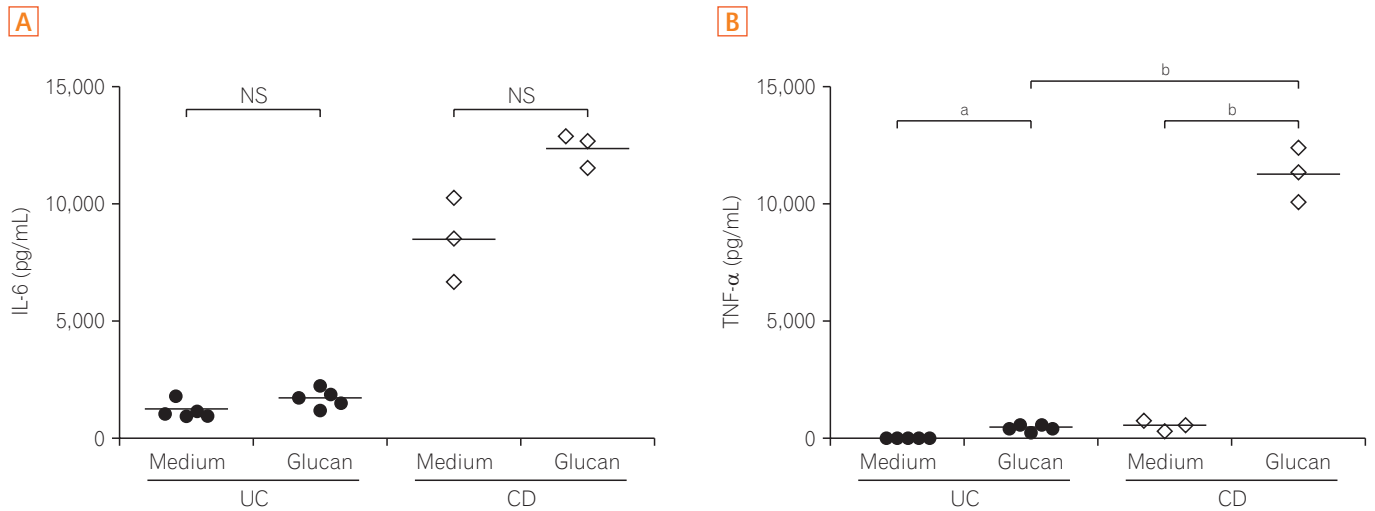

**Supplementary Fig. 2.** Pro-inflammatory cytokine production after stimulation with *Candida albicans* is higher in lamina propria mononuclear cells (LPMCs) from CD patients than those from UC patients. Whole LPMCs from patients with UC or CD were collected and stimulated with  $\beta$ -(1,3)-glucan for 24 hours. IL-6 (A) and TNF- $\alpha$  (B) secretion by macrophages isolated from the intestine of subjects with either UC or CD was analyzed using a cytometric bead array kit. Statistical analysis was performed using the Mann-Whitney *U*-test. <sup>a</sup>*P* < 0.05; <sup>b</sup>*P* < 0.001. IL-6, interleukin-6; TNF, tumor necrosis factor.
